# Supplementary material for: SENP1 inhibits ferroptosis and promotes head and neck squamous cell carcinoma by regulating ACSL4 protein stability via SUMO1
Source: PubMed Central journal article supplement — Oncol Rep. 2023 Dec 28;51(2):34. doi: 10.3892/or.2023.8693 (PMC10777466; doi:10.3892/or.2023.8693), 2023-12-28
Supplement: Supplementary_Data2.pdf [file Supplementary_Data2.pdf]

**Table SI.** A total of 40 ferroptosis genes for bioinformatics analysis.

| Ferroptosis genes |               |               |               |               |              |                |                 |
|-------------------|---------------|---------------|---------------|---------------|--------------|----------------|-----------------|
| <i>ACSL4</i>      | <i>AKRIC1</i> | <i>AKRIC2</i> | <i>AKRIC3</i> | <i>ALOX15</i> | <i>ALOX5</i> | <i>ALOX12</i>  | <i>ATP5MC3</i>  |
| <i>CARS1</i>      | <i>CBS</i>    | <i>CD44</i>   | <i>CHAC1</i>  | <i>CISD1</i>  | <i>CS</i>    | <i>DPP4</i>    | <i>FANCD2</i>   |
| <i>GCLC</i>       | <i>GCLM</i>   | <i>GLS2</i>   | <i>GPX4</i>   | <i>GSS</i>    | <i>HMGCR</i> | <i>HSPB1</i>   | <i>CRYAB</i>    |
| <i>LPCAT3</i>     | <i>MT1G</i>   | <i>NCOA4</i>  | <i>PTGS2</i>  | <i>RPL8</i>   | <i>SAT1</i>  | <i>SLC7A11</i> | <i>FDFT1</i>    |
| <i>TFRC</i>       | <i>TP53</i>   | <i>EMC2</i>   | <i>AIFM2</i>  | <i>PHKG2</i>  | <i>HSBP1</i> | <i>AC01</i>    | <i>SLC25A11</i> |
